# Supplementary material for: The Shear Damage Model of the Two-Component Forming Polymer Grouting Material-Bentonite Contact Surface
Source: Hindawi journal article supplement (doi:10.1155/2022/1843131), 2022-04-21
Supplement: f1 [file 1843131.f1.doc]

**The shear damage model of the two-component polymer grouting material-bentonite contact surface**

*Hao Zhanga, Mingrui Dub**, *Yan Zhaoc, Liangqiong Chena*

a School of Architecture and Civil Engineering, Xinyang Normal University, Xinyang 464000, China

b School of Water Conservancy Engineering, Zhengzhou University, Zhengzhou 450001, China;

c Harbin Institute of Technology National Engineering Research Center of Water Resources Co. LTD, Harbin 150000, China


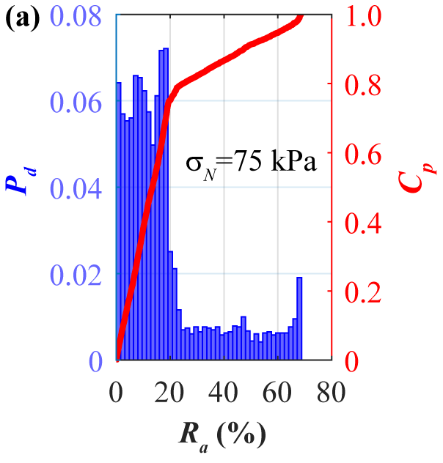

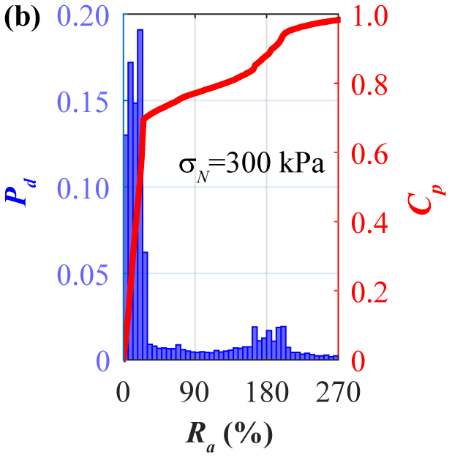


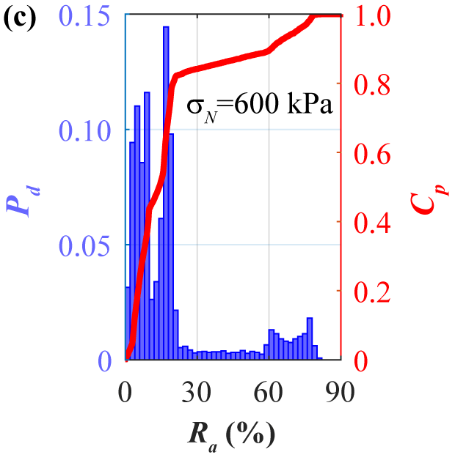

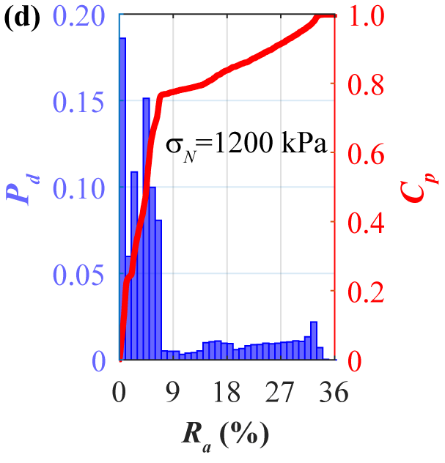


**Figure S1. Probability density of *Ra*.**

In Figure S1, ***Ra*** represents the relative error between the experimental and theoretical data of ***t*** at different ***g***, and ***Pd*** and ***Cp*** represent the probability density and the cumulative probability density of ***Ra***. ***Ra***, ***Pd*** and ***Cp*** are calculated as the follows:

(S1)

(S2)

(S3)

In Eq. (S1), andare the theoretical and experimental data of ***t*** at shear strain of ***g***, respectively.

In Eq. (S2), andrepresent the number of data points with ***Ra*** of ***Ra*0** and the total number of the data points, respectively.

Eq. (3) gives the cumulative probability density of ***Ra*** less than ***R*0**.
